# Supplementary material for: Microsatellite DNA markers for paternity identification in the hermaphroditic barnacle Chthamalus challengeri Hoek
Source: Research Square preprint supplement (doi:10.21203/rs.3.rs-7024057/v1), 2025-07-07
Supplement: Supplementary file 1 [file 32067a831d07bd014edaab81.docx]

**Online Resource 1**

- Journal: *Molecular Biology Reports*
- Title: Microsatellite DNA markers for paternity identification in the hermaphroditic barnacle *Chthamalus challengeri* Hoek
- Authors: Masami M. Tamechika, Yoichi Yusa, Shingo Akita, Masashi Sekino
- Corresponding author: Masami M. Tamechika (email: tamechi555@gmail.com), Graduate School of Fisheries Sciences, Hokkaido University.

**Tailed-primer PCR protocol (touchdown PCR)**

The following PCR conditions were based on the work of Kobayashi et al. (2020), with modifications including halving the volumes of the DNA solution and reaction mixture, reducing the concentration of the DNA solution from 10 ng/μL to 5 ng/μL, and adjusting the number of PCR cycles accordingly.

**Reaction mixture with tailed primer (7.5 μL)**

10× PCR buffer containing 15 mM MgCl2 0.75 μL

2 mM dNTPs 0.75 μL

HEX-labeled KS primer (5 pmol/μL) 0.25 μL

KS-tailed fwd primer (1 pmol/μL) 0.25 μL 0.13 μL

PIG-tailed rev primer (5 pmol/μL) 0.5 μL 0.25 μL

Taq polymerase (5 units/μL)1 0.05 μL

ddH2O 4.82 μL

DNA solution (5 ng/μL) 0.50 μL

1AmpliTaq Gold DNA polymerase (Applied Biosystems, Thermo Fisher Scientific)

**PCR cycling (touchdown PCR)**

94 °C 11.5 min (preheating)

**10 cycles of:**

94 °C 20 s

65 °C 30 s (decrease 1 °C every cycle)

72 °C 1 min

**X cycles2 of:**

94 °C 20 s

55 °C 30 s

72 °C 1.5 min

**Final elongation:**

72 °C 30 min

2We changed the number of PCR cycles depending on the marker: Cch3-28 (30 cycles); Cch3-31, Cch3-33, and Cch4-11 (23); Cch4-3 (18); Cch4-22 (21); Cch4-26 and Cch5-5 (24); Cch4-28 and Cch6-17 (20); Cch6-13 (22).

**Reference**

Kobayashi M, Yusa Y, Sekino M (2020) Microsatellite DNA markers applicable to paternity inference in the androdioecious gooseneck barnacle *Octolasmis warwickii* (Lepadiformes: Poecilasmatidae). Mol Biol Rep 47:4885–4890. <https://doi.org/10.1007/s11033-020-05473-9>

**Online Resource 2**

- Journal: *Molecular Biology Reports*
- Title: Microsatellite DNA markers for paternity identification in the hermaphroditic barnacle *Chthamalus challengeri* Hoek
- Authors: Masami M. Tamechika, Yoichi Yusa, Shingo Akita, Masashi Sekino
- Corresponding author: Masami M. Tamechika (email: tamechi555@gmail.com), Graduate School of Fisheries Sciences, Hokkaido University.

**PCR protocol with non-tailed fluorescent-labeled forward primers (touchdown PCR)**

PCR cycling parameters were the same as those described in Online Resource 1. The PCR mixture (below) was prepared by following the protocol described by Kobayashi et al. (2020), with modifications including halving the volumes of the DNA solution and reaction mixture, reducing the concentration of the DNA solution from 10 ng/μL to 5 ng/μL.

**Reaction mixture with fluorescence-labeled forward primers (7.5 μL)**

10× PCR buffer containing 15 mM MgCl2 0.75 μL

2 mM dNTPs 0.75 μL

Fluorescence-labeled fwd primer (5 pmol/μL) 0.25 μL

PIG-tailed rev primer (5 pmol/μL) 0.25 μL

Taq polymerase (5 units/μL)3 0.05 μL

ddH2O 4.95 μL

DNA solution (5 ng/μL) 0.50 μL

3AmpliTaq Gold DNA polymerase (Applied Biosystems, Thermo Fisher Scientific)

**Reference**

Kobayashi M, Yusa Y, Sekino M (2020) Microsatellite DNA markers applicable to paternity inference in the androdioecious gooseneck barnacle *Octolasmis warwickii* (Lepadiformes: Poecilasmatidae). Mol Biol Rep 47:4885–4890. <https://doi.org/10.1007/s11033-020-05473-9>

**Online Resource 3**

- Journal: *Molecular Biology Reports*
- Title: Microsatellite DNA markers for paternity identification in the hermaphroditic barnacle *Chthamalus challengeri* Hoek
- Authors: Masami M. Tamechika, Yoichi Yusa, Shingo Akita, Masashi Sekino
- Corresponding author: Masami M. Tamechika (email: tamechi555@gmail.com), Graduate School of Fisheries Sciences, Hokkaido University.

**PCR conditions for multiplex panels**

The PCR cycling parameters for multiplexing were mostly consistent with those described in Online Resource 1. However, we changed the number of PCR cycles of the step marked with footnote (2) in Online Resource 1 depending on the multiplex panel (see the “Number of cycles” column in the table below). The PCR reaction mixture was prepared essentially by following the method of Kobayashi et al. (2020), with modifications including halving the volumes of the DNA solution and reaction mixture, reducing the concentration of the DNA solution from 10 ng/μL to 5 ng/μL.

**Reaction mixture (7.5 μL)**

10× PCR buffer containing 15 mM MgCl2 0.75 μL

2 mM dNTPs 0.75 μL

Each fwd and rev primer (5 pmol/μL) *X* μL5

Taq polymerase (5 units/μL)4 0.05 μL

DNA solution (5 ng/μL) 0.50 μL

ddH2O Adjust to the final volume (7.5 μL)

4AmpliTaq Gold DNA polymerase (Applied Biosystems, Thermo Fisher Scientific)

5As shown in the table below, the volume of primers varied depending on the marker being used. Each forward primer was labeled with a fluorescent dye (NED, PET, or VIC).

| Multiplex panel | Marker name | Fluorescent dye | Volume of primers (µL) | Number of cycles |
| --- | --- | --- | --- | --- |
| A | Cch3-28 | 6-FAM | 0.30 | 35 |
| Cch4-26 | PET | 0.16 |
| B | Cch3-31 | VIC | 0.22 | 24 |
| Cch4-3 | NED | 0.08 |
| C | Cch3-33 | VIC | 0.20 | 21 |
| Cch4-11 | NED | 0.18 |
| D | Cch4-22 | VIC | 0.20 | 20 |
| Cch4-28 | NED | 0.20 |
| Cch6-13 | PET | 0.22 |
| E | Cch5-5 | PET | 0.20 | 22 |
| Cch6-17 | NED | 0.20 |

**Reference**

Kobayashi M, Yusa Y, Sekino M (2020) Microsatellite DNA markers applicable to paternity inference in the androdioecious gooseneck barnacle *Octolasmis warwickii* (Lepadiformes: Poecilasmatidae). Mol Biol Rep 47:4885–4890. <https://doi.org/10.1007/s11033-020-05473-9>
